# Supplementary material
Source: Springer Nature journal article supplement (https://www.springermedizin.de/resource/supplementary/12874_2006_210_MOESM1_ESM.pdf/9433996)
Supplement: MOESM1 [file 9433996]

**Table A - Missing responses among respondents. Fisher's exact test (two-sided)**

| Item                                      | Theme          | Missing (%) |      | p-value |
|-------------------------------------------|----------------|-------------|------|---------|
|                                           |                | Telephone   | Mail |         |
| Health in general                         | Well-being     | 0           | 0.92 | 0.004   |
| Health compared to one year ago           | Well-being     | 0           | 1.12 | 0.001   |
| Been withdrawn                            | Depression     | 0.13        | 2.04 | <0.0001 |
| Not able to deal with other people        | Depression     | 0.13        | 2.51 | <0.0001 |
| Not had the time to relax or enjoy myself | Well-being     | 0           | 3.23 | <0.0001 |
| Found it difficult to be happy            | Depression     | 0           | 2.70 | <0.0001 |
| Have eaten for comfort                    | Depression     | 0           | 3.76 | <0.0001 |
| Have been a bit touchy                    | Stress         | 0           | 3.76 | <0.0001 |
| Have lacked initiative                    | Stress         | 0           | 4.29 | <0.0001 |
| Have felt harassed                        | Stress         | 0.13        | 4.49 | <0.0001 |
| Feeling full of pep                       | Stress         | 0           | 2.04 | <0.0001 |
| A very nervous person                     | Stress         | 0           | 2.97 | <0.0001 |
| Nothing could cheer me up                 | Depression     | 0           | 3.36 | <0.0001 |
| Calm and peaceful                         | Well-being     | 0.13        | 3.89 | <0.0001 |
| Having a lot of energy                    | Well-being     | 0.13        | 4.49 | <0.0001 |
| Downhearted and blue                      | Depression     | 0.13        | 4.88 | <0.0001 |
| Worn out*                                 | Depression     | 0           | 4.29 | <0.0001 |
| A happy person                            | Well-being     | 0           | 5.41 | <0.0001 |
| Tired                                     | Well-being     | 0           | 4.49 | <0.0001 |
| Sick a little easier than other people    | Well-being     | 0           | 1.85 | <0.0001 |
| As healthy as anybody I know              | Well-being     | 0.13        | 5.08 | <0.0001 |
| Expect health to get worse                | Well-being     | 0.13        | 4.22 | <0.0001 |
| Excellent health                          | Well-being     | 0           | 6.00 | <0.0001 |
| Painkillers*                              | Medicine       | 0           | 1.58 | <0.0001 |
| Sedatives                                 | Medicine       | 0           | 3.50 | <0.0001 |
| Sleeping medicine                         | Medicine       | 0           | 3.63 | <0.0001 |
| Have had stomach ache or problem*         | Stress         | -           | -    | -       |
| Have had a tight chest or chest pains     | Stress         | 0           | 3.10 | <0.0001 |
| Have had palpitations                     | Stress         | 0           | 3.17 | <0.0001 |
| Have been short of breath                 | Stress         | 0           | 4.62 | <0.0001 |
| Have been dizzy                           | Stress         | 0           | 4.29 | <0.0001 |
| Have had tension in various muscles       | Stress         | 0           | 3.83 | <0.0001 |
| Have had a tendency to sweat              | Stress         | 0           | 3.63 | <0.0001 |
| Have had problems concentrating           | Stress         | 0.13        | 4.75 | <0.0001 |
| Have had difficulty in taking decisions   | Stress         | 0           | 4.02 | <0.0001 |
| Have had difficulty with remembering      | Stress         | 0.13        | 4.68 | <0.0001 |
| Have found it difficult to think clearly  | Stress         | 0           | 3.83 | <0.0001 |
| Smoking daily                             | Smoking habits | 0           | 0.73 | 0.02    |
| I can cope with most situations in life   | Self-esteem    | 0.13        | 1.85 | 0.0001  |
| No clear direction or purpose in life     | Self-esteem    | 0.26        | 3.89 | <0.0001 |
| Not able to influence my future           | Self-esteem    | 0.13        | 4.68 | <0.0001 |
| What I do in my daily life is meaningful  | Self-esteem    | 0           | 5.74 | <0.0001 |
| Things happen that I do not understand    | Self-esteem    | 0.26        | 4.95 | <0.0001 |
| I have a great deal to live for           | Self-esteem    | 0.13        | 6.00 | <0.0001 |
| Know what I ought to do, but not able to  | Self-esteem    | 0.51        | 4.42 | <0.0001 |

|                                             |             |      |      |         |
|---------------------------------------------|-------------|------|------|---------|
| Difficult to see how pieces in life connect | Self-esteem | 0.13 | 4.88 | <0.0001 |
| Understand most of my everyday life         | Self-esteem | 0    | 4.95 | <0.0001 |

---

Solid horizontal lines indicate blocks of questions with a common introduction

\* Three variables were partly corrupted during early data processing; two are left out from all further analyses; for “painkillers” see footnote to additional file 1: Table B.
